# Supplementary material for: An aqueous manganese–lead battery for large-scale energy storage
Source: Royal Society of Chemistry journal article supplement (doi:10.1039/d0ta01484b), 2020-01-01
Supplement: d0ta01484b1.pdf [file d0ta01484b1.pdf]

## Supplementary Information

### **Aqueous Manganese-Lead battery for large-scale energy storage**

Jianhang Huang,<sup>a,b</sup> Lei Yan,<sup>a</sup> Duan Bin,<sup>a</sup> Xiaoli Dong,<sup>a</sup> Yonggang Wang<sup>\*a</sup> and Yongyao Xia<sup>\*a,c</sup>

a. Department of Chemistry and Shanghai Key Laboratory of Molecular Catalysis and Innovative Materials, Institute of New Energy, iChEM (Collaborative Innovation Center of Chemistry for Energy Materials), Fudan University, Shanghai 200433, China.

b. School of Materials Science and Engineering, Nanchang Hangkong University, Nanchang 330063, China.

c. Key Laboratory of the Ministry of Education for Advanced Catalysis Materials, Department of Chemistry, Zhejiang Normal University, Jinhua 321004, China.

## Supplementary Figures

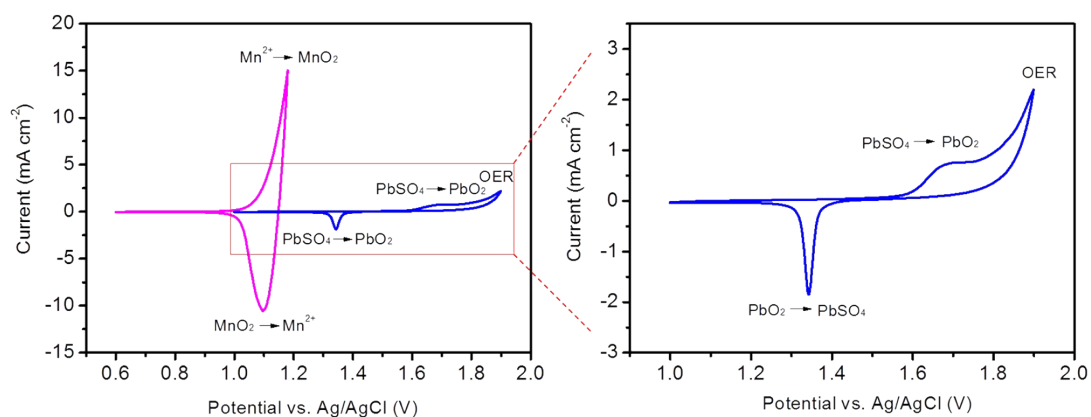

**Figure S1. Comparison between cyclic voltammetry (CV) of  $\text{Mn}^{2+}/\text{MnO}_2$  and  $\text{PbSO}_4/\text{PbO}_2$ .** CV for  $1 \text{ cm}^2$  carbon felt in the electrolyte containing  $1 \text{ M MnSO}_4 + 0.5 \text{ M H}_2\text{SO}_4$  at a sweep rate of  $1 \text{ mV s}^{-1}$  (pink curve) and  $1 \text{ cm}^2 \text{ PbO}_2$  electrode in the electrolyte containing  $0.5 \text{ M H}_2\text{SO}_4$  at a sweep rate of  $1 \text{ mV s}^{-1}$  (blue curve). From the enlarged CV of  $1 \text{ cm}^2 \text{ PbO}_2$  electrode in the electrolyte containing  $0.5 \text{ M H}_2\text{SO}_4$  at a sweep rate of  $1 \text{ mV s}^{-1}$ , it can be seen that the peak separation of  $\text{Mn}^{2+}/\text{MnO}_2$  is much smaller than that of  $\text{PbSO}_4/\text{PbO}_2$ , and the response current density is much higher than that of  $\text{PbSO}_4/\text{PbO}_2$ , indicating the faster kinetics of  $\text{Mn}^{2+}/\text{MnO}_2$  than  $\text{PbSO}_4/\text{PbO}_2$ .

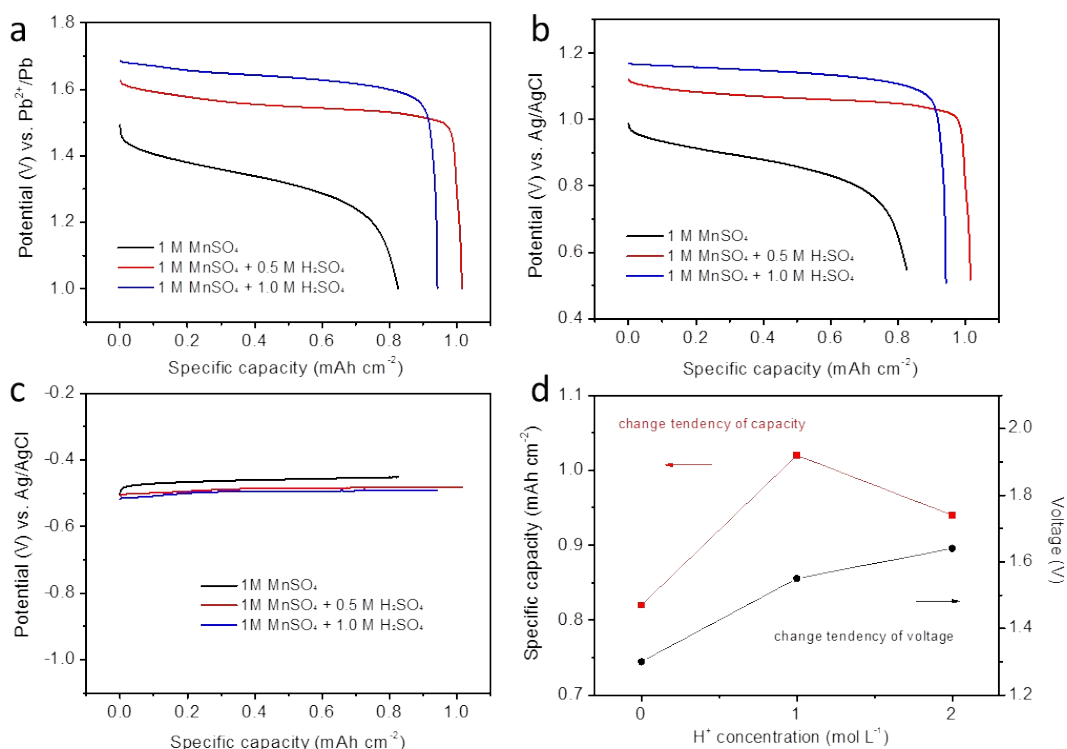

**Figure S2. The influence of H<sup>+</sup> concentration on the discharge profiles of Mn-Pb battery.** (a) The discharge profiles of Mn-Pb batteries using electrolyte with different acidity (0 M H<sub>2</sub>SO<sub>4</sub>, 0.5 M H<sub>2</sub>SO<sub>4</sub> and 1 M H<sub>2</sub>SO<sub>4</sub> respectively). The batteries are charged under 1.8 V to 1 mAh cm<sup>-2</sup>, and then discharged at 10 mA cm<sup>-2</sup> to 1 V. (b,c) The potential profiles (vs. Ag/AgCl) of cathodes (b) and anodes (c) using electrolyte with different acidity. (d) The variation tendency of capacity and voltage of batteries along with the electrolyte acidity.

The increase of discharge potential of the Mn-Pb battery can be explained by the Nernst equation:

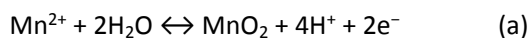

$$\varphi = \varphi^\theta + \frac{RT}{nF} \ln \frac{[a(\text{H}^+)]^4}{[a(\text{Mn}^{2+})]^1} \quad (\text{b})$$

where equation (a) is the overall redox reaction of MnO<sub>2</sub>/Mn<sup>2+</sup>, and equation (b) is the Nernst equation.  $\varphi$  is electrode potential,  $\varphi^\theta$  is standard electrode potential,  $R$  is gas constant (8.314 J K<sup>-1</sup> mol<sup>-1</sup>),  $T$  is the temperature (298 K),  $F$  is faraday constant (96485 J mol<sup>-1</sup> V<sup>-1</sup>),  $n$  is the number of electron involved in reaction,  $a$  (species) is the concentration of species when the activity coefficients is 1. So from equation (b) we know that when the concentration of sulfuric acid increases, the potential for redox of MnO<sub>2</sub>/Mn<sup>2+</sup> will increase.

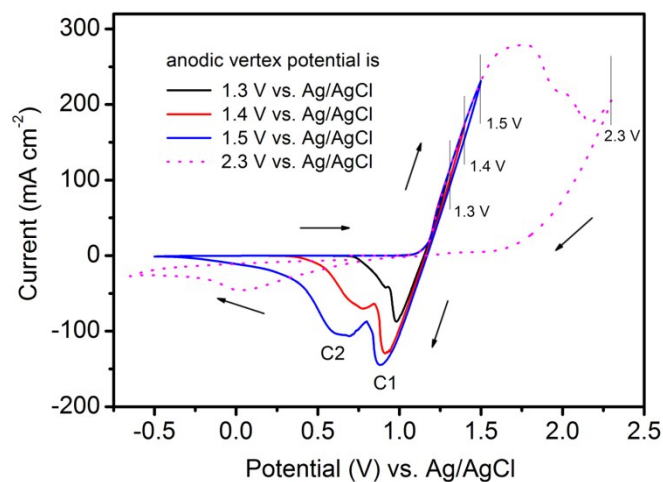

**Figure S3. The evolution of cathodic peaks of  $\text{MnO}_2/\text{Mn}^{2+}$  with different anodic vertex potential.** The CV curves of carbon felt in the electrolyte containing 1 M  $\text{MnSO}_4$  and 0.5 M  $\text{H}_2\text{SO}_4$  at a sweep rate of  $1 \text{ mV s}^{-1}$  with anodic vertex potential of 1.3 V to 1.5 V vs. Ag/AgCl, respectively. With the increase of anodic vertex potential, the area of C2 peak becomes large and roughly equivalent to the C1 peak. In addition, further increasing the vertex potential (pink dashed curve) will make the deposited  $\text{MnO}_2$  irreversible, it is possibly because that the  $\text{MnO}_2$  crystal formed under too high voltage is hard to be reduced.

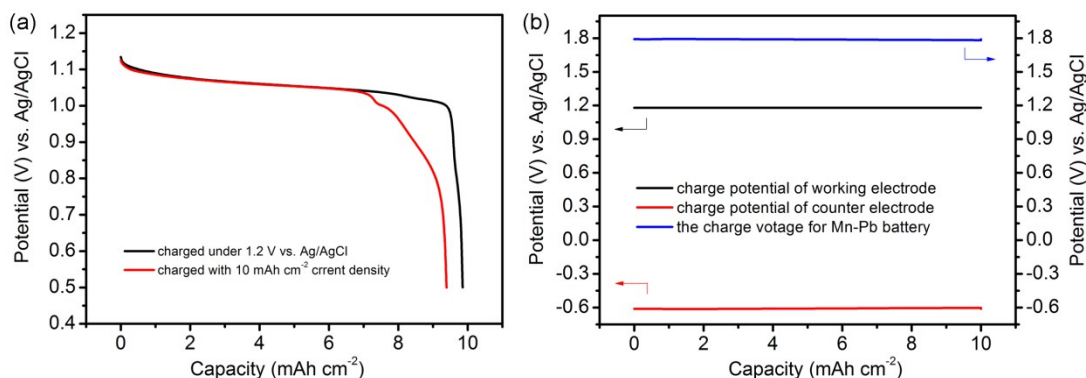

**Figure S4. Comparison of discharge curves for the MnO<sub>2</sub> electrode with different charging technology and the determination of charge voltage of Mn-Pb battery.**

(a) Discharge curve of MnO<sub>2</sub> electrode with constant-voltage charging technology (black curve) and constant-current charging technology (red curve). For the constant-voltage charging, the working electrode (carbon felt) is charged under 1.18 V vs. Ag/AgCl to 10 mAh cm<sup>-2</sup> (charge potential of 1.18 V will make sure that the main redox of MnO<sub>2</sub>/Mn<sup>2+</sup> will follow Pathway 1), and discharged at 10 mA cm<sup>-2</sup> to 0.5 V vs. Ag/AgCl. For the constant-current charging, the working electrode (carbon felt) is charged at 10 mA cm<sup>-2</sup> to 10 mAh cm<sup>-2</sup>, and discharged at 10 mA cm<sup>-2</sup> to 0.5 V vs. Ag/AgCl. Three-electrode system is used in this testing, and the electrolyte is 1 M MnSO<sub>4</sub> + 0.5 M H<sub>2</sub>SO<sub>4</sub>, the working electrode is carbon felt, counter electrode is excess PbSO<sub>4</sub> electrode, and the reference electrode is Ag/AgCl. It can be seen that the discharge curve of working electrode using constant-voltage charge technique shows one discharge platform, strongly demonstrate that Pathway 1 is the main mechanism for redox of MnO<sub>2</sub>/Mn<sup>2+</sup>. However, the discharge curve of working electrode using constant-current charge technique shows obvious two discharge voltage platform, indicating that the constant-current charge technique is unable to control redox mechanism of MnO<sub>2</sub>/Mn<sup>2+</sup>. (b) The charge voltage of Mn-Pb battery when the working electrode (carbon felt) is charged under 1.18 V vs. Ag/AgCl. The potential of counter electrode (PbSO<sub>4</sub>) is about -0.61 V vs. Ag/AgCl, so the voltage for Mn-Pb battery is about 1.79 V. For convenience, a charge voltage of 1.8 V is chosen to charge the Mn-Pb battery in subsequent experiments.

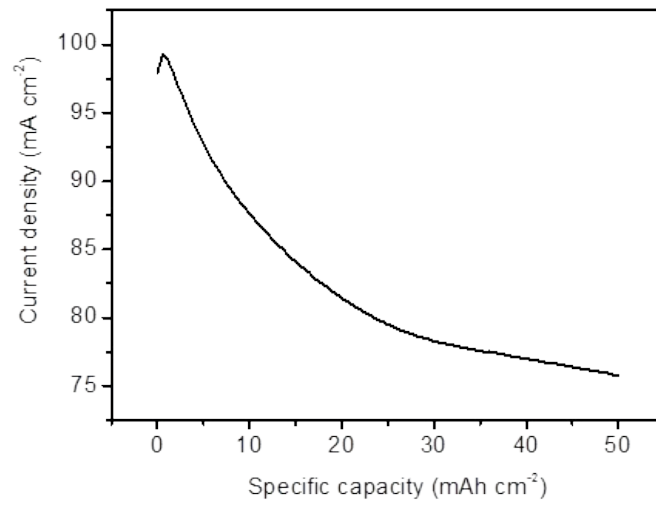

**Figure S5. The charge current profile of Mn-Pb battery.** The battery is charged under 1.8 V to 50 mAh cm<sup>-2</sup>.

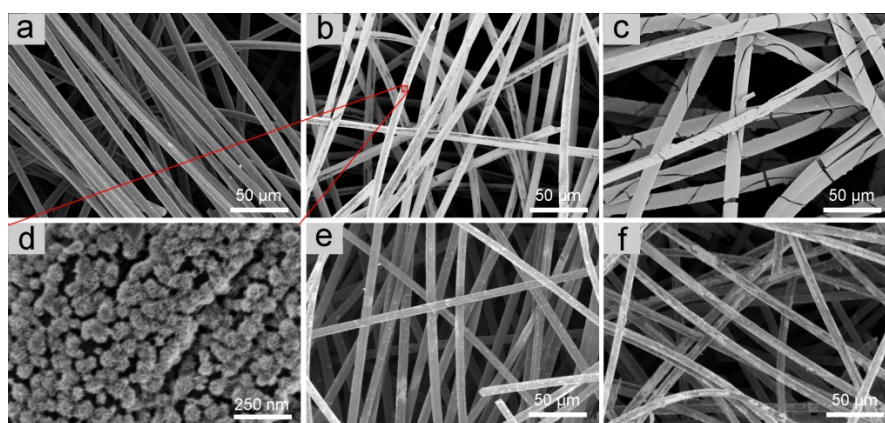

**Figure S6. Morphology of carbon felt during the charge/discharge process. (a-c)** The bare carbon felt **(a)**, carbon felt with  $1 \text{ mAh cm}^{-2}$  **(b)** and  $50 \text{ mAh cm}^{-2}$  **(c)** deposition capacity. **(d)** Enlarged view of the carbon felt with  $1 \text{ mAh cm}^{-2}$  deposition capacity. **(e,f)** The morphology after discharging to 1 V for the carbon felt with  $1 \text{ mAh cm}^{-2}$  **(e)** and  $50 \text{ mAh cm}^{-2}$  **(f)** deposition capacity. The batteries are charged under 1.8 V to 1 and  $50 \text{ mAh cm}^{-2}$  respectively and discharged at  $10 \text{ mA cm}^{-2}$  to 1 V.

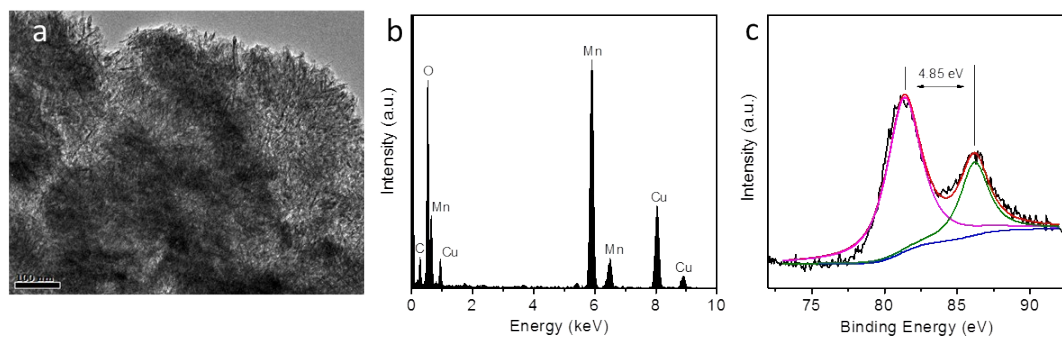

**Figure S7. Characterization of the deposit on carbon felt during the charge process.** (a) TEM image for the deposit on carbon felt with  $10 \text{ mAh cm}^{-2}$  deposition capacity. (b) EDS analysis of the deposit on carbon felt. (c) XPS spectra of the deposit. The spin-energy separation of Mn 3s doublet is 4.85 eV, indicating that the deposit formed during charge process mainly containing  $\text{MnO}_2$ .



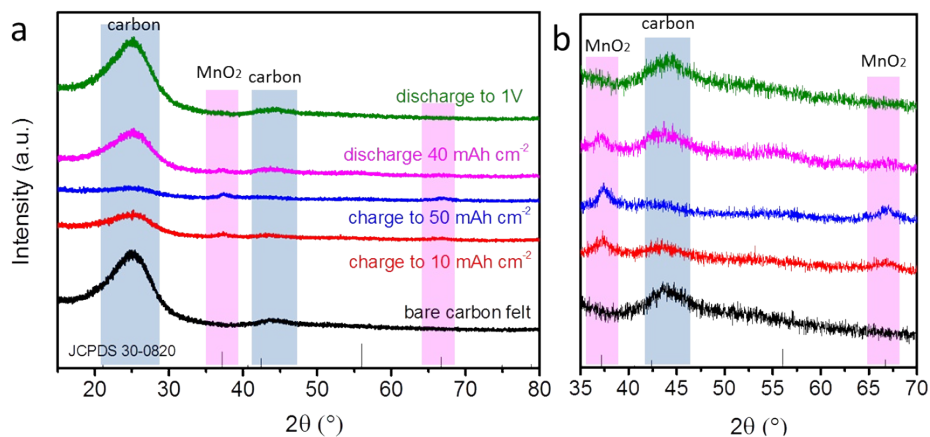

**Figure S8. Evolution of XRD patterns during charge/discharge process. (a)** With the deposition of MnO<sub>2</sub> (charging process), the carbon diffraction peaks at 26° and 44° shrink rapidly due to the shield of the deposited MnO<sub>2</sub> on the surface of carbon felt. And during the discharge process, the carbon diffraction peaks are recovered. **(b)** The enlarged view of **(a)** from 35° to 70°. With the shrink of carbon diffraction peak, new diffraction peaks at 37° and 67° emerge, which can be assigned to the (100), (102) and (110) planes of akhtenskite MnO<sub>2</sub> (JCPDS 30-0820).

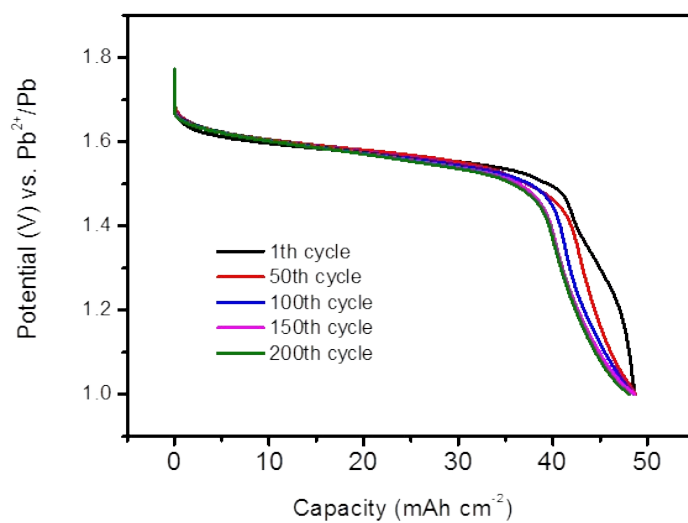

**Figure S9. Evolution of discharge profiles for the battery with 50 mAh cm<sup>-2</sup> deposition capacity.** The battery is charged under 1.8 V to 50 mAh cm<sup>-2</sup>, and then discharged at 10 mA cm<sup>-2</sup> to 1 V.

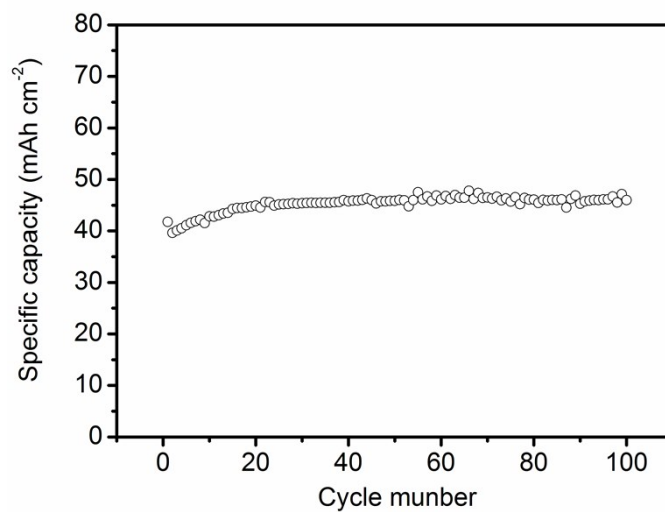

**Figure S10. Cycle performance of Mn-Pn battery at high discharge current density of 40 mA cm<sup>-2</sup>.** The cell is charged under 1.8 V to 50 mAh cm<sup>-2</sup> and discharged at 40 mA cm<sup>-2</sup> to cut-off voltage of 1 V. It shows an average 45.3 mAh cm<sup>-2</sup> with 90.6 % Coulombic efficiency over 100 cycles.

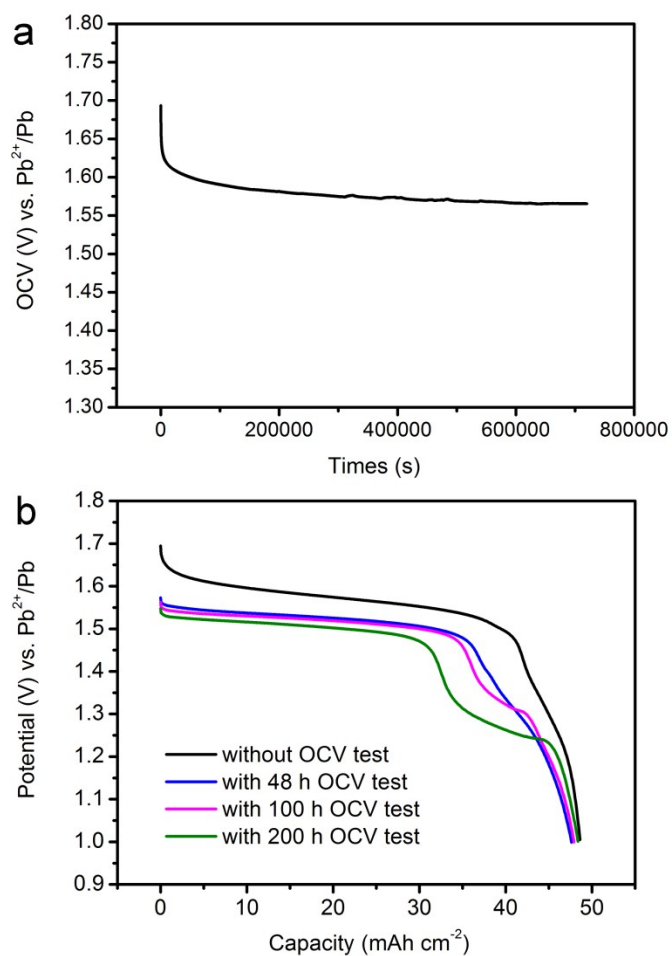

**Figure S11. Self-discharge performance of the Mn-Pb battery. (a)** Variation tendency of open circuit potential (OCV) during 200 hours settling time. The battery is charged under 1.8 V to 50  $\text{mAh cm}^{-2}$  first. **(b)** The comparison of discharge curves (discharged current is 10  $\text{mA cm}^{-2}$  to 1 V) for the battery with 0 (black curve), 48 (blue curve), 100 (violet curve) and 200 hours (green curve) OCV test.

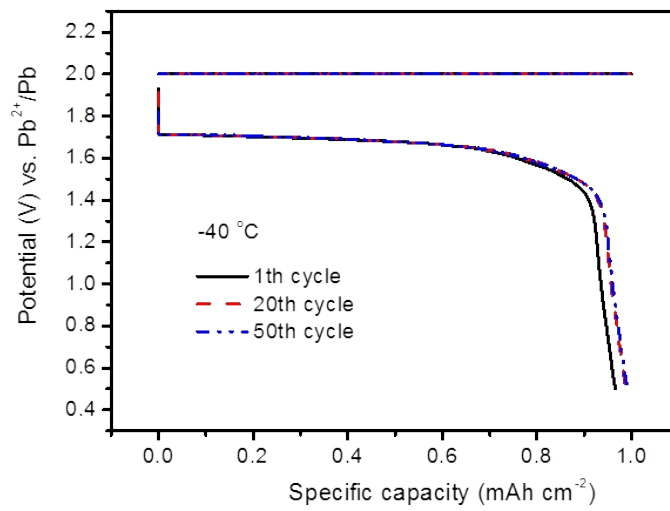

**Figure S12. Charge/discharge profiles of Mn-Pb battery at -40 °C .** 3 M H<sub>2</sub>SO<sub>4</sub> +1 M H<sub>2</sub>SO<sub>4</sub> is used as electrolyte in order to decrease the freezing point, the battery is charged under 2V and discharged at 0.2 mA cm<sup>-2</sup>. Both charge and discharge process are conducted at -40 °C .

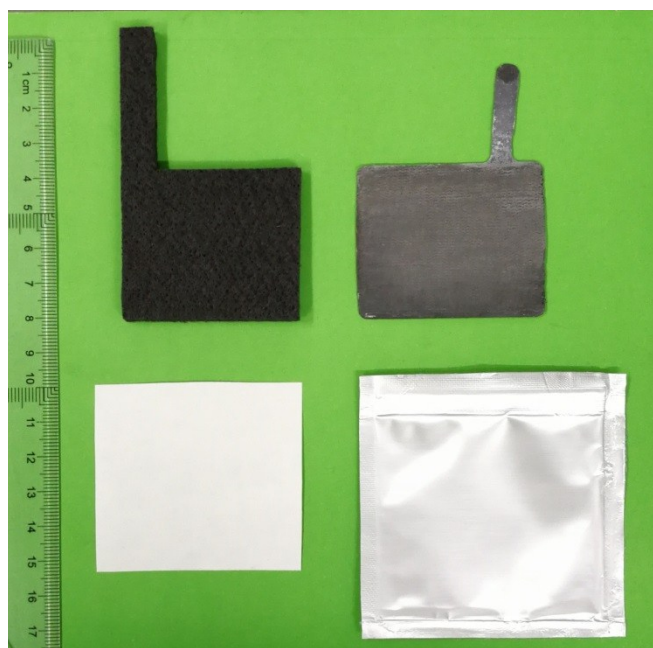

**Figure S13. Exhibition of the components for the pouch battery.** The pouch battery consists of one piece of carbon felt ( $40 \times 50 \times 5$  mm) as cathode current collector, one piece of  $\text{PbSO}_4$  anode ( $40 \times 50$  mm) and a filter paper is used as separator.

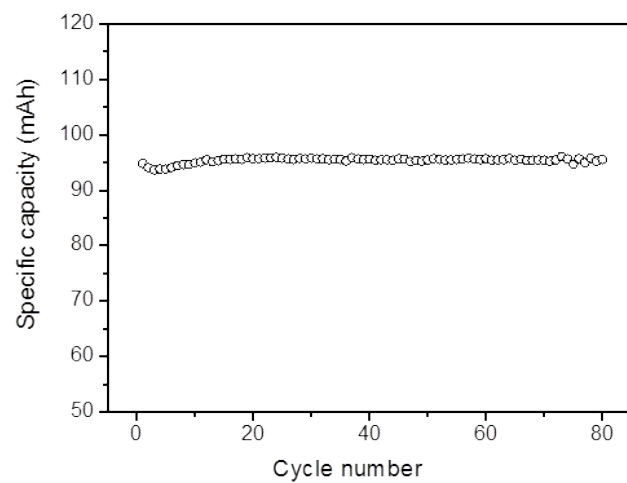

**Figure S14. Cycle performance of pouch battery.** The battery is charged under 1.8 V to 100 mAh, and discharged at 50 mA to 1 V.

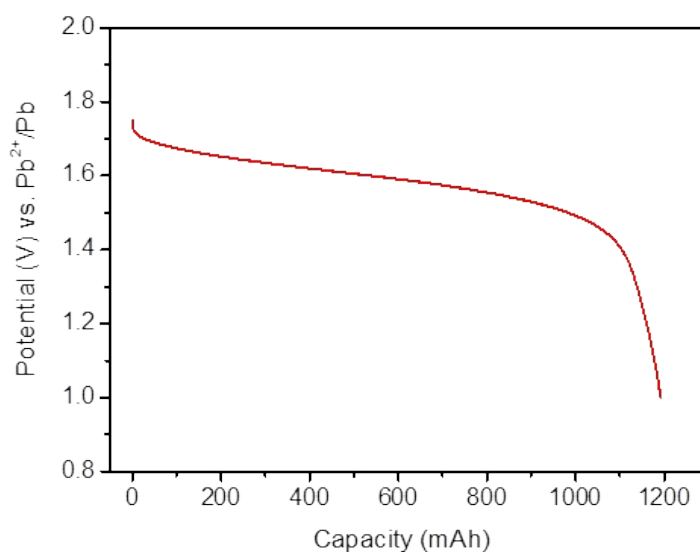

**Figure S15. Capacity determination of the Mn-Pb pouch battery using 10 mL electrolyte with 3 M MnSO<sub>4</sub> and 0.5 M H<sub>2</sub>SO<sub>4</sub>.** The battery is charged under 1.8 V to theoretical capacity of 1608 mAh, and discharged at 20 mA to 1 V. The actual discharge capacity and energy is 1192 mAh and 1.87 Wh, respectively, corresponding to a high volumetric energy density of 187 Wh L<sup>-1</sup> based on volume of electrolyte, and 124.6 Wh L<sup>-1</sup> at the battery level (the volume of entire battery is about 15 cm<sup>3</sup>). The active material for positive redox chemistry is MnSO<sub>4</sub> in electrolyte, which is 4.53 g. And the anode material is PbSO<sub>4</sub>, which is 12 g. So based on the actual mass of the cathode and anode materials, the gravimetric energy density of Mn-Pb pouch battery is 113 Wh kg<sup>-1</sup>.



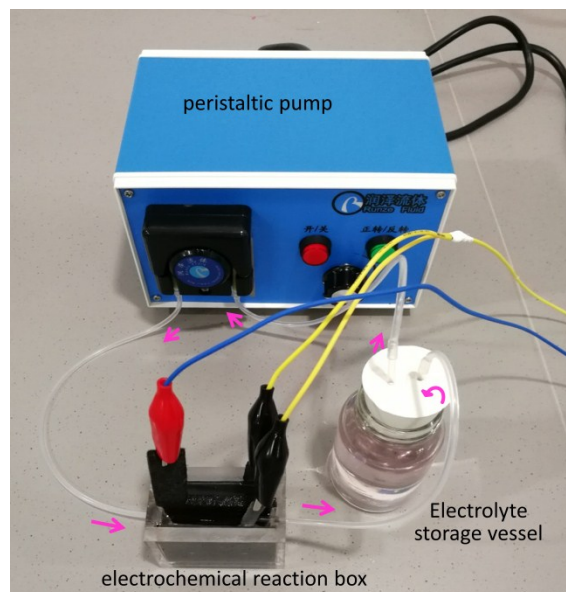

**Figure S16. Exhibition of the flow-assisted Mn-Pb battery.** Photograph of the assembled flow-assisted Mn-Pb battery. The pink arrows show the flow direction of electrolyte.

## Supplementary Tables

### Cost estimation

The main cost of the Mn-Pb cell is  $\text{MnSO}_4 \cdot \text{H}_2\text{O}$ ,  $\text{H}_2\text{SO}_4$  and Pb. And the average price of  $\text{MnSO}_4 \cdot \text{H}_2\text{O}$  (electroplating grade) is US\$ 0.55  $\text{kg}^{-1}$ , 98%  $\text{H}_2\text{SO}_4$  is US\$ 0.2  $\text{kg}^{-1}$ , and Pb is US\$ 2.15  $\text{kg}^{-1}$ , which was obtained from [www.alibaba.com](http://www.alibaba.com). The cost of the cell is calculated according to the following equation:  $P = \sum_i p_i m_i / E$ , where  $P$  is the capital cost per unit of discharged electrical energy (US\$  $\text{kWh}^{-1}$ ),  $p_i$  is the cost per unit of above materials used in Mn-Pb cell (US\$  $\text{kg}^{-1}$ ),  $m_i$  is the mass of materials (kg), and  $E$  is the discharged energy of the cell (kWh), which is obtained from the pouch Mn-Pb battery. And the detailed calculation is presented in Supplementary **Table S1**.

**Table S1.** Capital cost estimation of a pouch battery. The pouch battery contains 10 mL 0.5 M  $\text{H}_2\text{SO}_4$  + 3 M  $\text{MnSO}_4$  electrolyte, Pb anode and carbon felt as cathode current collector

|                             | $\text{H}_2\text{SO}_4$ | $\text{MnSO}_4 \cdot \text{H}_2\text{O}$ | Pb    | total |
|-----------------------------|-------------------------|------------------------------------------|-------|-------|
| $n_i / \text{mol}$          | 0.005                   | 0.03                                     | 0.03  |       |
| $M_i / \text{g mol}^{-1}$   | 100 (98%)               | 169                                      | 207   |       |
| $m_i / \text{g}$            | 0.5                     | 5.07                                     | 6.21  |       |
| $p_i / \text{US\$ kg}^{-1}$ | 0.2                     | 0.55                                     | 2.15  |       |
| $p_i m_i / \text{US\$}$     | 0.0001                  | 0.0028                                   | 0.013 | 0.016 |
| $E / \text{Wh}$             | 1.87                    |                                          |       |       |
| $P / \text{US\$ kWh}^{-1}$  | <b>8.6</b>              |                                          |       |       |
| $F / \text{C mol}^{-1}$     | 96485.4                 |                                          |       |       |

**Table S2.** Cost comparisons of the Mn-Pb battery to the current state-of-the-art battery systems for large-scale energy storage

| Technology option                      | Maturity        | Cost<br>(US\$ kWh <sup>-1</sup> )                     | Reference       |
|----------------------------------------|-----------------|-------------------------------------------------------|-----------------|
| Li-Sb-Pb liquid metal battery          | research        | 65<br>based on electrode materials                    | 1               |
| AQDS-Br <sub>2</sub> flow <sup>a</sup> | research        | 27<br>based on electrolyte                            | 2               |
| Zn-ion battery                         | research        | 60<br>based on electrode materials                    | 3               |
| Li-ion battery                         | commercial      | 250-2000                                              | 4-9             |
| Na-S                                   | commercial      | 450-550                                               | 5, 8            |
| Zn-Br flow                             | demo            | 300-350                                               | 6, 8            |
| V redox                                | demo            | 400-1500                                              | 5, 8            |
| Pb-acid                                | commercial      | 50-500                                                | 5, 8, 10        |
| <b>Mn-Pb battery</b>                   | <b>research</b> | <b>8.6<br/>based on electrolyte and<br/>electrode</b> | <b>Our work</b> |

<sup>a</sup> AQDS = 9,10-anthraquinone-2,7-disulphonic acid

All the references in supplementary information are also cited in main-text.

**Table S3.** Performance comparisons of the Mn-Pb battery to the current state-of-the-art battery systems for large-scale energy storage

| Technology option                      | No. of Cycles                          | Energy density                                                                                                                     | Reference       |
|----------------------------------------|----------------------------------------|------------------------------------------------------------------------------------------------------------------------------------|-----------------|
| Li-Sb-Pb liquid metal battery          | 450<br>(94% retention)                 | -                                                                                                                                  | 1               |
| AQDS-Br <sub>2</sub> flow <sup>a</sup> | 15<br>(without decay)                  | 50 Wh L <sup>-1</sup><br>based on electrolyte                                                                                      | 2               |
| TEMPO-viologen flow <sup>b</sup>       | 10000<br>(80% retention)               | 10 Wh L <sup>-1</sup><br>based on electrolyte                                                                                      | 11              |
| K-ion battery                          | 2000<br>(73% retention)                | 80 Wh kg <sup>-1</sup><br>based on cathode and anode                                                                               | 12              |
| Li-ion*                                | 2000                                   | 300 Wh kg <sup>-1</sup>                                                                                                            | 8, 13, 14       |
| Na-S*                                  | 4000                                   | 200 Wh kg <sup>-1</sup>                                                                                                            | 8, 15           |
| Zn-Br flow                             | 10000                                  | 70 Wh kg <sup>-1</sup>                                                                                                             | 8, 16, 17       |
| V redox                                | 10000                                  | 40 Wh L <sup>-1</sup>                                                                                                              | 8, 18           |
| Pb-acid                                | < 1000 cycle                           | 50 Wh kg <sup>-1</sup>                                                                                                             | 8, 10, 15       |
| <b>Mn-Pb battery</b>                   | <b>10000</b><br><b>(without decay)</b> | <b>187 Wh L<sup>-1</sup></b><br><b>based on electrolyte,</b><br><b>113 Wh kg<sup>-1</sup></b><br><b>based on cathode and anode</b> | <b>Our work</b> |

<sup>a</sup> AQDS = 9,10-anthraquinone-2,7-disulphonic acid

<sup>b</sup> TEMPO = 2,2,6,6-tetramethylpiperidinyloxy, viologen = 4,4'-bipyridine derivative

\* Li-ion and Na-S battery possess high energy density. However, the safety issue (such as flammability and explosion of Li-ion battery, thermal runaway of Na-S battery that must work under high temperature) is a great challenge for the large-scale energy storage. Whereas, the Mn-Pb battery shows high safety, low cost and long cycle life, which are more important to the large-scale energy storage.

All the references in supplementary information are also cited in main-text.

## **Supplementary Video**

### **Video S1: Exhibition of the pouch Mn-Pb battery.**

The toy car works smoothly when powered by two pouch battery in series connection (the toy car requires a power  $\sim 2$  W).

### **Video S2: Penetration test of the Mn-Pb battery.**

A mini-fan (requiring a power of  $\sim 500$  mW) can be powered by one pouch battery. Although the rotational speed of the mini-fan is lowered by the nail penetration, it can be recovered immediately after remove of nails, which shows high tolerance against battery abuse.

## Supplementary Reference (All the references in supplementary information are

also cited in main-text)

1. K. Wang, K. Jiang, B. Chung, T. Ouchi, P. J. Burke, D. A. Boysen, D. J. Bradwell, H. Kim, U. Muecke and D. R. Sadoway, *Nature*, 2014, **514**, 348-350.
2. B. Huskinson, M. P. Marshak, C. Suh, S. Er, M. R. Gerhardt, C. J. Galvin, X. Chen, A. Aspuru-Guzik, R. G. Gordon and M. J. Aziz, *Nature*, 2014, **505**, 195-198.
3. D. Kundu, B. D. Adams, V. Duffort, S. H. Vajargah and L. F. Nazar, *Nat. Energy*, 2016, **1**, 16119.
4. B. Dunn, H. Kamath and J. M. Tarascon, *Science*, 2011, **334**, 928-935.
5. O. Schmidt, A. Hawkes, A. Gambhir and I. Staffell, *Nat. Energy*, 2017, **2**, 17110.
6. R. M. Darling, K. G. Gallagher, J. A. Kowalski, S. Ha and F. R. Brushett, *Energy Environ. Sci.*, 2014, **7**, 3459-3477.
7. Z. P. Cano, D. Banham, S. Ye, A. Hintennach, J. Lu, M. Fowler and Z. Chen, *Nat. Energy*, 2018, **3**, 279-289.
8. B. Zakeri and S. Syri, *Renew. Sust. Energy Rev.*, 2015, **42**, 569-596.
9. B. Nykvist and M. Nilsson, *Nat. Clim. Chang.*, 2015, **5**, 329-332.
10. J. O. G. Posada, A. J. R. Rennie, S. P. Villar, V. L. Martins, J. Marinaccio, A. Barnes, C. F. Glover, D. A. Worsley and P. J. Hall, *Renew. Sust. Energy Rev.*, 2017, **68**, 1174-1182.
11. T. Janoschka, N. Martin, U. Martin, C. Friebe, S. Morgenstern, H. Hiller, M. D. Hager and U. S. Schubert, *Nature*, 2015, **527**, 78-81.
12. L. Jiang, Y. Lu, C. Zhao, L. Liu, J. Zhang, Q. Zhang, X. Shen, J. Zhao, X. Yu, H. Li, X. Huang, L. Chen and Y.-S. Hu, *Nat. Energy*, 2019, **4**, 495-503.
13. J. Liu, Z. Bao, Y. Cui, E. J. Dufek, J. B. Goodenough, P. Khalifah, Q. Li, B. Y. Liaw, P. Liu, A. Manthiram, Y. S. Meng, V. R. Subramanian, M. F. Toney, V. V. Viswanathan, M. S. Whittingham, J. Xiao, W. Xu, J. Yang, X.-Q. Yang and J.-G. Zhang, *Nat. Energy*, 2019, **4**, 180-186.
14. R. Schmuch, R. Wagner, G. Hörpel, T. Placke and M. Winter, *Nat. Energy*, 2018, **3**, 267-278.
15. Z. Yang, J. Zhang, M. C. Kintner-Meyer, X. Lu, D. Choi, J. P. Lemmon and J. Liu, *Chem. rev.*, 2011, **111**, 3577-3613.
16. M. Skyllas-Kazacos, M. H. Chakrabarti, S. A. Hajimolana, F. S. Mjalli and M. Saleem, *J. Electrochem. Soc.*, 2011, **158**, R55.
17. T. M. Gur, *Energy Environ. Sci.*, 2018, **11**, 2696-2767.
18. J. Winsberg, T. Hagemann, T. Janoschka, M. D. Hager and U. S. Schubert, *Angew. Chem. Int. Edit.*, 2017, **56**, 686-711.
